# Supplementary material
Source: ML conference proceedings conference paper supplement (https://proceedings.neurips.cc/paper_files/paper/2010/hash/0d0fd7c6e093f7b804fa0150b875b868-Abstract.html)
Supplement: Supplementary file 2 [file 0d0fd7c6e093f7b804fa0150b875b868-Supplemental.zip]

Archive with 1 entries (1 files):
- extra/NIPS2010_0408_extra.pdf
